# Supplementary material
Source: publisher figshare collection journal article supplement (https://tandf.figshare.com/ndownloader/files/16457267)
Supplement: Supplementary file 1 [file 16457267]

**Supplementary Table 1. Effect of different sterilants on survival of Gerbera** capitulum explants

| **Sterilants used** | **Time (min)** | **No. of survived explants (out of 30 inoculated)** | **% of survival** | **% of contamination** | **Response observed** |
| --- | --- | --- | --- | --- | --- |
| **C2H5OH followed by HgCl2** | | | | | |
| 50 % C2H5OH 0.05 HgCl2 | 3  3 | 21 ± 3 | 70 | 42 | Bacterial and fungal contamination |
| 50 % C2H5OH 0.10 HgCl2 | 3  3 | 19 ± 2 | 63 | 38 | Bacterial and fungal contamination |
| 50 % C2H5OH 0.05 HgCl2 | 3  3 | 14 ± 3 | 46 | 49 | Bacterial and fungal contamination |
| 50 % C2H5OH 0.10 HgCl2 | 3  3 | 16 ± 2 | 53 | 43 | Bacterial and fungal contamination |
| 70 % C2H5OH 0.05 HgCl2 | 5  5 | 11 ± 2 | 37 | 32 | Partial browning |
| 70 % C2H5OH 0.10 HgCl2 | 5  5 | 07 ± 1 | 23 | 23 | Complete browning |
| 70 % C2H5OH 0.05 HgCl2 | 5  5 | 08 ± 2 | 27 | 22 | Complete browning |
| 70 % C2H5OH 0.10 HgCl2 | 5  5 | 04 ± 1 | 13 | 18 | Complete browning |
| **NaOCl followed by HgCl2** | | | | | |
| 5 % NaOCl 0.05 HgCl2 | 3  3 | 18 ± 2 | 60 | 35 | Bacterial & fungal contamination |
| 5 % NaOCl 0.10 HgCl2 | 3  3 | 17 ± 2 | 57 | 30 | Bacterial & fungal contamination |
| 10 % NaOCl 0.05 HgCl2 | 3  3 | 28 ± 1 | 93 | 07 | Healthy explant |
| 10 % NaOCl 0.10 HgCl2 | 3  3 | 21 ± 2 | 70 | 05 | Partial browning |
| 5 % NaOCl 0.05 HgCl2 | 5  5 | 26 ± 1 | 87 | 18 | Fungal contamination |
| 5 % NaOCl 0.10 HgCl2 | 5  5 | 25 ± 1 | 83 | 11 | Fungal contamination |
| 10 % NaOCl 0.05 HgCl2 | 5  5 | 20 ± 1 | 67 | 33 | Fungal contamination |
| 10 % NaOCl 0.10 HgCl2 | 5  5 | 22 ± 1 | 73 | 29 | Fungal contamination |

Values are mean + S.E of 3 replicates;

**Supplementary Table 2. Induction of morphogenetic response of *G. jamesoni*** capitulum explants under dark conditions

| **Hormone** | | **% response** | |
| --- | --- | --- | --- |
| **TDZ** | | | |
| 0.25 | | 20 | |
| 0.50 | | 30 | |
| 0.70 | | 20 | |
| 1.00 | | 10 | |
| **Hormone** | **% response** | **Hormone** | **% response** |
| **TDZ + 2,4-D** | | **TDZ + 2,4-D + NAA** | |
| 0.25 + 0.25 | 30 | 0.25 + 0.25 + 1.0 | 50 |
| 0.25 + 0.50 | 40 | 0.25 + 0.50 + 1.0 | 70 |
| 0.25 + 0.75 | 20 | 0.25 + 0.75 + 1.0 | 60 |
| 0.25 + 1.00 | 10 | 0.25 + 1.00 + 1.0 | 50 |
| 0.50 + 0.25 | 35 | 0.50 + 0.25 + 2.0 | 70 |
| 0.50 + 0.50 | 45 | 0.50 + 0.50 + 2.0 | 80 |
| **0.50 + 0.75** | **50** | **0.50 + 0.75 + 2.0** | **90** |
| 0.50 + 1.00 | 40 | 0.50 + 1.00 + 2.0 | 80 |
| 0.70 + 0.25 | 30 | 0.70 + 0.25 + 3.0 | 40 |
| 0.70 + 0.50 | 45 | 0.70 + 0.50 + 3.0 | 60 |
| 0.70 + 0.75 | 20 | 0.70 + 0.75 + 3.0 | 40 |
| 0.70 + 1.00 | 10 | 0.70 + 1.00 + 3.0 | 30 |
| 1.00 + 0.25 | 30 | 1.00 + 0.25 + 4.0 | 55 |
| 1.00 + 0.50 | 20 | 1.00 + 0.50 + 4.0 | 60 |
| 1.00 + 0.75 | 40 | 1.00 + 0.75 + 4.0 | 45 |
| 1.00 + 1.00 | 20 | 1.00 + 1.00 + 4.0 | 35 |
